# Supplementary material
Source: MDPI journal article supplement (https://www.mdpi.com/2073-4441/15/6/1122)
Supplement: s1 [file s1]

## Supplemental Data

**Supplemental Data Table S1.**

| <b>Mean Sample<br/>Length (cm)</b> | <b>Median Sample<br/>Length (cm)</b> | <b>Minimum Sample<br/>Length (cm)</b> | <b>Maximum Sample<br/>Length (cm)</b> |
|------------------------------------|--------------------------------------|---------------------------------------|---------------------------------------|
| <b>26.4</b>                        | <b>25.4</b>                          | <b>14.4</b>                           | <b>43.4</b>                           |

**Supplementary Data Table S2**

| <b>Lake Name</b> | <b>Site Number</b> | <b>Method</b> | <b>Hydraulic Conductivity (m/day)</b> |
|------------------|--------------------|---------------|---------------------------------------|
| Police lake      | 2                  | Falling head  | 0.0424                                |
| Police lake      | 3                  | Falling head  | 0.226                                 |
| Police lake      | 4                  | Falling head  | 0.206                                 |
| Police lake      | 5                  | Falling head  | 0.735                                 |
| Police lake      | 6                  | Falling head  | 1.72                                  |
| Police lake      | 7                  | Falling head  | 0.232                                 |
| Police lake      | 8                  | Falling head  | 0.189                                 |
| Police lake      | 9                  | Falling head  | 0.0164                                |
| Police lake      | 10                 | Falling head  | 0.0265                                |
| Police lake      | 11                 | Falling head  | 0.0616                                |
| Police lake      | 12                 | Falling head  | 0.00354                               |
| Police lake      | 13                 | Falling head  | 0.0513                                |
| Police lake      | 14                 | Falling head  | 0.0684                                |
| Police lake      | 15                 | Falling head  | 0.0139                                |
| Police lake      | 16                 | Falling head  | 0.0462                                |
| Police lake      | 18                 | Falling head  | 0.153                                 |
| Police lake      | 19                 | Falling head  | 0.198                                 |
| Police lake      | 20                 | Falling head  | 0.163                                 |
| Police lake      | 21                 | Falling head  | 0.00528                               |
| Police lake      | 22                 | Gravity drain | 2.75                                  |
| Police lake      | 24                 | Gravity drain | 2.78                                  |
| Police lake      | 25                 | Falling head  | 0.00362                               |
| Police lake      | 26                 | Gravity drain | 2.04                                  |
| SOVI lake        | 1                  | Falling head  | 0.634                                 |

|           |    |               |         |
|-----------|----|---------------|---------|
| SOVI lake | 2  | Falling head  | 0.0935  |
| SOVI lake | 3  | Falling head  | 0.486   |
| SOVI lake | 4  | Falling head  | 0.177   |
| SOVI lake | 5  | Falling head  | 0.651   |
| SOVI lake | 6  | Gravity drain | 4.09    |
| SOVI lake | 7  | Falling head  | 0.454   |
| SOVI lake | 8  | Gravity drain | 0.786   |
| SOVI lake | 10 | Falling head  | 0.00213 |
| SOVI lake | 11 | Gravity drain | 1.86    |
| SOVI lake | 12 | Gravity drain | 2.34    |
| SOVI lake | 12 | Falling head  | 8.8     |
| SOVI lake | 13 | Falling head  | 0.00954 |
| SOVI lake | 14 | Falling head  | 0.00657 |
| SOVI lake | 15 | Falling head  | 0.0126  |
| SOVI lake | 16 | Falling head  | 0.00199 |
| SOVI lake | 17 | Falling head  | 3.9     |
| SOVI lake | 18 | Falling head  | 1.15    |
| SOVI lake | 19 | Falling head  | 3.29    |
| SOVI lake | 20 | Falling head  | 8.06    |
| SOVI lake | 21 | Falling head  | 0.832   |
| SOVI lake | 22 | Falling head  | 0.0517  |

**Supplementary Data Table S3**

| <b>Pond Name</b> | <b>Site Number</b> | <b>%Organic Content</b> | <b>Number of Layers</b> | <b>Mean Grain Size (um)</b> | <b>Median D<sub>10</sub> Grain Size Value (um)</b> |
|------------------|--------------------|-------------------------|-------------------------|-----------------------------|----------------------------------------------------|
| Police pond      | 2                  | 47                      | 2                       | 200                         | 10                                                 |
| Police pond      | 3                  | 17                      | 2                       | 200                         | 7                                                  |
| Police pond      | 4                  | 2.5                     | 2                       | 200                         | 10                                                 |
| Police pond      | 5                  | 6.7                     | 4                       | 100                         | 4                                                  |
| Police pond      | 6                  | 3.8                     | 3                       | 200                         | 8                                                  |
| Police pond      | 7                  | 0.91                    | 3                       | 200                         | 9                                                  |
| Police pond      | 8                  | 21                      | 4                       | 100                         | 4                                                  |
| Police pond      | 9                  | 5.6                     | 5                       | 100                         | 3                                                  |
| Police pond      | 10                 | 7.1                     | 2                       | 200                         | 8                                                  |
| Police pond      | 11                 | 1.8                     | 3                       | 200                         | 8                                                  |
| Police pond      | 12                 | 17                      | 4                       | 60                          | 2                                                  |
| Police pond      | 13                 | 13                      | 1                       | 80                          | 4                                                  |

|             |    |      |   |     |     |
|-------------|----|------|---|-----|-----|
| Police pond | 14 | 7.7  | 2 | 200 | 20  |
| Police pond | 15 | 20   | 3 | 100 | 3   |
| Police pond | 16 | 5.3  | 4 | 100 | 5   |
| Police pond | 18 | 7    | 3 | 200 | 6   |
| Police pond | 19 | 0.87 | 3 | 200 | 90  |
| Police pond | 20 | 7.1  | 3 | 200 | 6   |
| Police pond | 21 | 10   | 6 | 80  | 2   |
| Police pond | 22 | 0.76 | 3 | 200 | 100 |
| Police pond | 24 | 0.62 | 2 | 200 | 100 |
| Police pond | 25 | 24   | 3 | 50  | 2   |
| Police pond | 26 | 0.72 | 2 | 200 | 100 |
| SOVI pond   | 1  | 1.5  | 1 | 200 | 20  |
| SOVI pond   | 2  | 7.2  | 4 | 200 | 0.3 |
| SOVI pond   | 3  | 1.2  | 1 | 200 | 40  |
| SOVI pond   | 4  | 8.1  | 4 | 200 | 10  |
| SOVI pond   | 5  | 6.3  | 4 | 200 | 20  |
| SOVI pond   | 6  | 1.8  | 3 | 200 | 30  |
| SOVI pond   | 7  | 2    | 2 | 200 | 90  |
| SOVI pond   | 8  | 0.8  | 4 | 200 | 90  |
| SOVI pond   | 10 | 12   | 3 | 90  | 2   |
| SOVI pond   | 11 | 1.7  | 5 | 200 | 80  |
| SOVI pond   | 12 | 0.33 | 1 | 200 | 100 |
| SOVI pond   | 12 | 0.33 | 1 | 200 | 100 |
| SOVI pond   | 13 | 4.3  | 5 | 200 | 5   |
| SOVI pond   | 14 | 13   | 3 | 100 | 3   |
| SOVI pond   | 15 | 9.5  | 2 | 100 | 3   |
| SOVI pond   | 16 | 10   | 2 | 100 | 3   |
| SOVI pond   | 17 | 1.1  | 4 | 200 | 50  |
| SOVI pond   | 18 | 1.3  | 4 | 200 | 20  |
| SOVI pond   | 19 | 1.9  | 4 | 200 | 80  |
| SOVI pond   | 20 | 1.2  | 3 | 200 | 70  |
| SOVI pond   | 21 | 9.8  | 4 | 200 | 20  |
| SOVI pond   | 22 | 2    | 3 | 200 | 7   |
